# Supplementary material
Source: PubMed Central journal article supplement (PMC8418820)
Supplement: NIHMS1730498-supplement-1.pdf [file NIHMS1730498-supplement-1.pdf]

**Table S1, related to Figure 1. Human E1-specific mAb VLP and recombinant protein binding in presence of the nonionic detergent Tween®20.**

| Binding Group    | EEEV mAb | EC <sub>50</sub> (ng/mL; [Tween®20]) |       |      |         |          |         |              |
|------------------|----------|--------------------------------------|-------|------|---------|----------|---------|--------------|
|                  |          | Virus-like particles (VLPs)          |       |      | Protein |          |         |              |
|                  |          | EEEV                                 | VEEV  | WEEV | EEEV E1 | CHIKV E1 | MAYV E1 | EEEV E3E2/E2 |
| EEEV-specific    | EEEV-76  | 30                                   | >     | >    | 7       | >        | >       | >            |
|                  | EEEV-104 | 8                                    | >     | >    | 36      | >        | >       | >            |
|                  | EEEV-109 | 9                                    | >     | >    | 2       | >        | >       | >            |
|                  | EEEV-126 | 11                                   | >     | >    | 13      | >        | >       | >            |
|                  | EEEV-127 | 9                                    | >     | >    | 7       | >        | >       | >            |
|                  | EEEV-312 | 1,895                                | >     | >    | 13      | >        | >       | >            |
|                  | EEEV-320 | 22                                   | >     | >    | 17      | >        | >       | >            |
|                  | EEEV-377 | 11                                   | >     | >    | 9       | >        | >       | >            |
|                  | EEEV-379 | 85                                   | >     | >    | 5       | >        | >       | >            |
|                  | EEEV-398 | 24                                   | >     | >    | 9       | >        | >       | >            |
|                  | EEEV-400 | 11                                   | >     | >    | 8       | >        | >       | >            |
| EEEV-VEEV        | EEEV-157 | 11                                   | 1,731 | >    | 3       | >        | >       | >            |
| New World        | EEEV-179 | 11                                   | 20    | 16   | 34      | >        | >       | >            |
| Broadly-reactive | EEEV-307 | 6                                    | 8     | >    | 14      | 33       | 33      | >            |
|                  | EEEV-354 | 7                                    | 5     | >    | 21      | 14       | 41      | >            |
| Pan-alphavirus   | EEEV-138 | 8                                    | 5     | 9    | 15      | 61       | 16      | >            |
|                  | EEEV-342 | 16                                   | 8     | 35   | 35      | 24       | 40      | >            |
|                  | EEEV-346 | 3                                    | 2     | 3    | 14      | 12       | 14      | >            |
|                  | EEEV-368 | 5                                    | 5     | 6    | 19      | 12       | 29      | >            |
|                  | EEEV-387 | 9                                    | 11    | 10   | 10      | 40       | 50      | >            |

> symbol indicates > 5 µg/mL

**Table S2, related to Figures 2, 3, S2, S3, and S4. Human E1-specific mAb epitope mapping.**

| Binding Group    | EEEV mAb | Epitope                                                                                             | Critical Binding Residues <sup>1</sup> or Potential Interacting Peptides <sup>2</sup>                          |
|------------------|----------|-----------------------------------------------------------------------------------------------------|----------------------------------------------------------------------------------------------------------------|
| EEEV-specific    | EEEV-76  | Domain II<br>(central $\beta$ sheet, ij loop)                                                       | T218, L220                                                                                                     |
|                  | EEEV-104 | Domain II<br>(central $\beta$ sheet, gh loop)                                                       | Y93, Y193                                                                                                      |
|                  | EEEV-109 | Domain III                                                                                          | 289-300, 348-353                                                                                               |
|                  | EEEV-126 | Domain II<br>(cd loop)                                                                              | Q79                                                                                                            |
|                  | EEEV-127 | Domain II<br>(ij loop)                                                                              | L220                                                                                                           |
|                  | EEEV-312 | Domain II<br>(cd loop, central $\beta$ sheet, ij loop)                                              | V80, F81, Y85, F87, W89, G90, G91, F95, N100, T218, L220                                                       |
|                  | EEEV-320 | Domain II<br>(central $\beta$ sheet)                                                                | G182                                                                                                           |
|                  | EEEV-377 | Domain II<br>(ij loop)                                                                              | L220                                                                                                           |
|                  | EEEV-379 | Unknown                                                                                             | ND                                                                                                             |
|                  | EEEV-398 | Domain I                                                                                            | G165, S168, S169, W171                                                                                         |
|                  | EEEV-400 | Domain II<br>central $\beta$ sheet, gh loop                                                         | K197                                                                                                           |
| EEEV-VEEV        | EEEV-157 | Domain III                                                                                          | 353-366                                                                                                        |
| New World        | EEEV-179 | Domain I (DI), Domain II (DII), Fusion loop, Domain III (DIII), DI/DII hinge region, DI/DIII linker | Y93, A286, N361; 37-45, 80-92, 107-113, 141-146, 147-162, 191-201, 202-214, 221-228, 229-254, 262-271, 288-300 |
| Broadly-reactive | EEEV-307 | Fusion loop                                                                                         | W89, G91, F95                                                                                                  |
|                  | EEEV-354 |                                                                                                     | W89, Y93, F95                                                                                                  |
| Pan-alphavirus   | EEEV-138 |                                                                                                     | F95, N100                                                                                                      |
|                  | EEEV-342 |                                                                                                     | W89, F95, N100                                                                                                 |
|                  | EEEV-346 |                                                                                                     | W89, F95, N100                                                                                                 |
|                  | EEEV-368 |                                                                                                     | G91, F95                                                                                                       |
|                  | EEEV-387 |                                                                                                     | F95                                                                                                            |

<sup>1</sup>Critical binding residues were determined through cell-surface-display antigen binding, EEEV and CHIKV E1 alanine-scanning mutagenesis library analyses.

<sup>2</sup>Potential interacting peptides were determined by comparison of relative deuterium uptake between unbound and bound states of the EEEV E1 glycoprotein through HDX-MS.

ND = not determined

**Table S3, related to Figure 5. Human E1-specific mAb temperature-independent binding.**

| EEEV mAb | Temperature-dependent binding EC <sub>50</sub> (ng/mL; [1× PBS]) |      |      |      |      |      |      |      |       |         |       |       |          |       |       |         |       |       |
|----------|------------------------------------------------------------------|------|------|------|------|------|------|------|-------|---------|-------|-------|----------|-------|-------|---------|-------|-------|
|          | Virus-like particles (VLPs)                                      |      |      |      |      |      |      |      |       | Protein |       |       |          |       |       |         |       |       |
|          | EEEV                                                             |      |      | VEEV |      |      | WEEV |      |       | EEEV E1 |       |       | CHIKV E1 |       |       | MAYV E1 |       |       |
|          | 22°C                                                             | 37°C | 42°C | 22°C | 37°C | 42°C | 22°C | 37°C | 42°C  | 22°C    | 37°C  | 42°C  | 22°C     | 37°C  | 42°C  | 22°C    | 37°C  | 42°C  |
| 76       | 40                                                               | 55   | 123  | >    | >    | >    | >    | >    | >     | >       | >     | >     | >        | >     | >     | >       | >     | >     |
| 104      | 105                                                              | 102  | 115  | >    | >    | >    | >    | >    | >     | >       | >     | >     | >        | >     | >     | >       | >     | >     |
| 109      | 16                                                               | 15   | 21   | >    | >    | >    | >    | >    | >     | 198     | 188   | 189   | >        | >     | >     | >       | >     | >     |
| 126      | 43                                                               | 41   | 62   | >    | >    | >    | >    | >    | >     | 690     | 1,020 | 395   | >        | >     | >     | >       | >     | >     |
| 127      | 35                                                               | 42   | 58   | >    | >    | >    | >    | >    | >     | 374     | 294   | 252   | >        | >     | >     | >       | >     | >     |
| 312      | >                                                                | >    | >    | >    | >    | >    | >    | >    | >     | 94      | 44    | 65    | >        | >     | >     | >       | >     | >     |
| 320      | 180                                                              | 143  | 135  | >    | >    | >    | >    | >    | >     | >       | >     | >     | >        | >     | >     | >       | >     | >     |
| 377      | 50                                                               | 41   | 53   | >    | >    | >    | >    | >    | >     | 409     | 4,220 | 630   | >        | >     | >     | >       | >     | >     |
| 379      | 739                                                              | 663  | 791  | >    | >    | >    | >    | >    | >     | 49      | 33    | 50    | >        | >     | >     | >       | >     | >     |
| 398      | 152                                                              | 135  | 163  | >    | >    | >    | >    | >    | >     | 1,096   | 289   | 262   | >        | >     | >     | >       | >     | >     |
| 400      | 44                                                               | 35   | 55   | >    | >    | >    | >    | >    | >     | >       | >     | >     | >        | >     | >     | >       | >     | >     |
| 157      | 174                                                              | 192  | 174  | >    | >    | >    | >    | >    | >     | 222     | 230   | 214   | >        | >     | >     | >       | >     | >     |
| 179      | 49                                                               | 55   | 40   | 519  | 530  | 412  | 395  | 360  | 698   | 2,686   | 1,100 | 1,651 | >        | >     | >     | >       | >     | >     |
| 307      | 85                                                               | 86   | 68   | 192  | 346  | 210  | >    | >    | >     | 927     | 328   | 262   | >        | >     | >     | 357     | 943   | 397   |
| 354      | 94                                                               | 107  | 84   | 142  | 86   | 122  | >    | >    | >     | 410     | 235   | 348   | 405      | 1,342 | 765   | 356     | 342   | 226   |
| 138      | 23                                                               | 25   | 26   | 53   | 39   | 35   | 112  | 99   | 127   | 194     | 249   | 292   | 401      | 419   | 646   | 836     | 688   | 724   |
| 342      | 53                                                               | 66   | 52   | 64   | 96   | 51   | 340  | 371  | 1,063 | 567     | 309   | 324   | 285      | 2,708 | 1,300 | 371     | 3,175 | 629   |
| 346      | 18                                                               | 19   | 15   | 20   | 25   | 13   | 30   | 34   | 32    | 122     | 182   | 131   | 148      | 272   | 172   | 113     | 186   | 168   |
| 368      | 83                                                               | 58   | 81   | 338  | 110  | 69   | 293  | 155  | 253   | 317     | 265   | 237   | 1,020    | 1,607 | 346   | 355     | 247   | 409   |
| 387      | 118                                                              | 69   | 130  | 461  | 250  | 158  | 163  | 102  | 168   | 232     | 626   | 351   | 2,017    | 4,931 | 4,933 | 2,440   | 1,044 | 3,597 |

> symbol indicates > 5 µg/mL

**Table S4, related to Figure 4. Human E1-specific mAb acidic pH-dependent or pH-independent binding.**

| EEEV mAb | Binding EC <sub>50</sub> (ng/mL; [in 1× PBS]) for indicated antigen and pH (5.4 or 7.4) |       |       |       |       |       |         |       |          |       |         |       |
|----------|-----------------------------------------------------------------------------------------|-------|-------|-------|-------|-------|---------|-------|----------|-------|---------|-------|
|          | Virus-like particles (VLPs)                                                             |       |       |       |       |       | Protein |       |          |       |         |       |
|          | EEEV                                                                                    |       | VEEV  |       | WEEV  |       | EEEV E1 |       | CHIKV E1 |       | MAYV E1 |       |
|          | 5.4                                                                                     | 7.4   | 5.4   | 7.4   | 5.4   | 7.4   | 5.4     | 7.4   | 5.4      | 7.4   | 5.4     | 7.4   |
| EEEV-76  | 292                                                                                     | 790   | >     | >     | >     | >     | >       | >     | >        | >     | >       | >     |
| EEEV-104 | 154                                                                                     | 300   | >     | >     | >     | >     | >       | >     | >        | >     | >       | >     |
| EEEV-109 | 726                                                                                     | 1,183 | >     | >     | >     | >     | 579     | 675   | >        | >     | >       | >     |
| EEEV-126 | 174                                                                                     | 330   | >     | >     | >     | >     | >       | >     | >        | >     | >       | >     |
| EEEV-127 | 114                                                                                     | 297   | >     | >     | >     | >     | >       | >     | >        | >     | >       | >     |
| EEEV-312 | 172                                                                                     | >     | >     | >     | >     | >     | 318     | 285   | >        | >     | >       | >     |
| EEEV-320 | 164                                                                                     | 499   | >     | >     | >     | >     | >       | >     | >        | >     | >       | >     |
| EEEV-377 | 197                                                                                     | 509   | >     | >     | >     | >     | >       | >     | >        | >     | >       | >     |
| EEEV-379 | >                                                                                       | >     | >     | >     | >     | >     | 615     | 396   | >        | >     | >       | >     |
| EEEV-398 | 1,970                                                                                   | 1,078 | >     | >     | >     | >     | >       | >     | >        | >     | >       | >     |
| EEEV-400 | 198                                                                                     | 246   | >     | >     | >     | >     | >       | >     | >        | >     | >       | >     |
| EEEV-157 | 1586                                                                                    | 1118  | >     | >     | >     | >     | 945     | 748   | >        | >     | >       | >     |
| EEEV-179 | 108                                                                                     | 202   | >     | >     | 1,790 | 1,760 | >       | >     | >        | >     | 610     | >     |
| EEEV-307 | 147                                                                                     | 299   | 342   | 3,001 | 4,363 | 4,009 | 862     | 1,315 | >        | 1,647 | >       | 1,211 |
| EEEV-354 | 245                                                                                     | 562   | 412   | 3,053 | >     | >     | 692     | 978   | 4,696    | 2,889 | 4,028   | 2,020 |
| EEEV-138 | 90                                                                                      | 221   | 143   | 277   | 137   | 308   | 696     | 711   | 556      | 337   | 2,014   | 1,020 |
| EEEV-342 | 154                                                                                     | 578   | 267   | 664   | 394   | 2,912 | 3,451   | 2,998 | 2,750    | >     | 2,795   | 965   |
| EEEV-346 | 12                                                                                      | 31    | 21    | 43    | 20    | 59    | 64      | 131   | 177      | 88    | 534     | 365   |
| EEEV-368 | 282.7                                                                                   | 979.2 | 503.8 | >     | 587.3 | 3,400 | 1,883   | 722.4 | >        | >     | 2,134   | 1,350 |
| EEEV-387 | 237                                                                                     | 626   | 599   | 2,941 | 195   | 769   | 2,958   | >     | >        | >     | >       | 3,536 |

> symbol indicates > 5 µg/mL

**Table S5, related to Figures 5 and S6. Human E1-specific mAb neutralization activity.**

| Binding group    | EEEV mAb | IC <sub>50</sub> (ng/mL [37°C; 42°C]) |              |           |       |      | Egress inhibition (yes or no) |
|------------------|----------|---------------------------------------|--------------|-----------|-------|------|-------------------------------|
|                  |          | SINV/EEEV                             | SINV/VEEV    | SINV/WEEV | CHIKV | MAYV | SINV/EEEV                     |
| EEEV-specific    | EEEV-76  | >                                     | NA           |           |       |      | no                            |
|                  | EEEV-104 | >                                     |              |           |       |      | yes                           |
|                  | EEEV-109 | >                                     |              |           |       |      | yes                           |
|                  | EEEV-126 | >                                     |              |           |       |      | yes                           |
|                  | EEEV-127 | >                                     |              |           |       |      | no                            |
|                  | EEEV-312 | >                                     |              |           |       |      | no                            |
|                  | EEEV-320 | >                                     |              |           |       |      | no                            |
|                  | EEEV-377 | >                                     |              |           |       |      | no                            |
|                  | EEEV-379 | >                                     |              |           |       |      | no                            |
|                  | EEEV-398 | >                                     |              |           |       |      | no                            |
| EEEV-400         | >        | no                                    |              |           |       |      |                               |
| EEEV-VEEV        | EEEV-157 | >                                     | >            | >         | >     | >    | no                            |
| New World        | EEEV-179 | >                                     | >            | >         | >     | >    | yes                           |
| Broadly-reactive | EEEV-307 | >                                     | >            | >         | >     | >    | no                            |
|                  | EEEV-354 | >                                     | 3,505; 5,042 | >         | >     | >    | no                            |
| Pan-alphavirus   | EEEV-138 | >                                     | >            | >         | >     | >    | no                            |
|                  | EEEV-342 | >                                     | 3,558; 3,732 | >         | >     | >    | no                            |
|                  | EEEV-346 | >                                     | 2,044; 3,207 | >         | >     | >    | no                            |
|                  | EEEV-368 | >                                     | >            | >         | >     | >    | no                            |
|                  | EEEV-387 | >                                     | 2,112; >     | >         | >     | >    | no                            |

> symbol indicates > 5 µg/mL

NA = not applicable
