# Supplementary material
Source: PubMed Central journal article supplement (PMC8418820)

A

| mAb or Fab | % WT binding (mean (SD)) for CHIKV E2/E1 protein |             |             |              |
|------------|--------------------------------------------------|-------------|-------------|--------------|
|            | WT                                               | W89A        | F95A        | N100A        |
| EEEEV-342  | 100 (11.1)                                       | 9.1 (3.8)   | 6.9 (2.7)   | 4.1 (1.7)    |
| EEEEV-138  | 100 (6.5)                                        | 52.1 (21.9) | 3.1 (1.3)   | 3.2 (1.9)    |
| EEEEV-346  | 100 (20.8)                                       | 12.2 (2.0)  | 6.6 (1.2)   | 9.1 (4.9)    |
| EEEEV-307  | 100 (9.9)                                        | 5.2 (2.1)   | 11.5 (4.0)  | 86.5 (9.6)   |
| EEEEV-354  | 100 (22.1)                                       | 21.5 (13.8) | 20.1 (14.0) | 57.8 (12.6)  |
| EEEEV-368  | 100 (13.1)                                       | 58.5 (27.1) | 19.2 (9.6)  | 111.6 (17.9) |
| EEEEV-387  | 100 (27.1)                                       | 64.2 (9.1)  | 21.1 (7.7)  | 124.2 (20.2) |

B

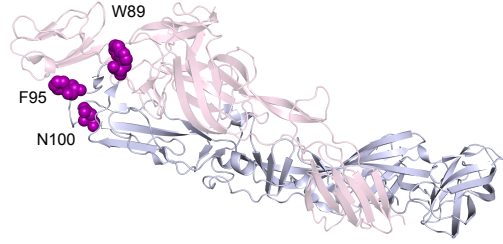

C

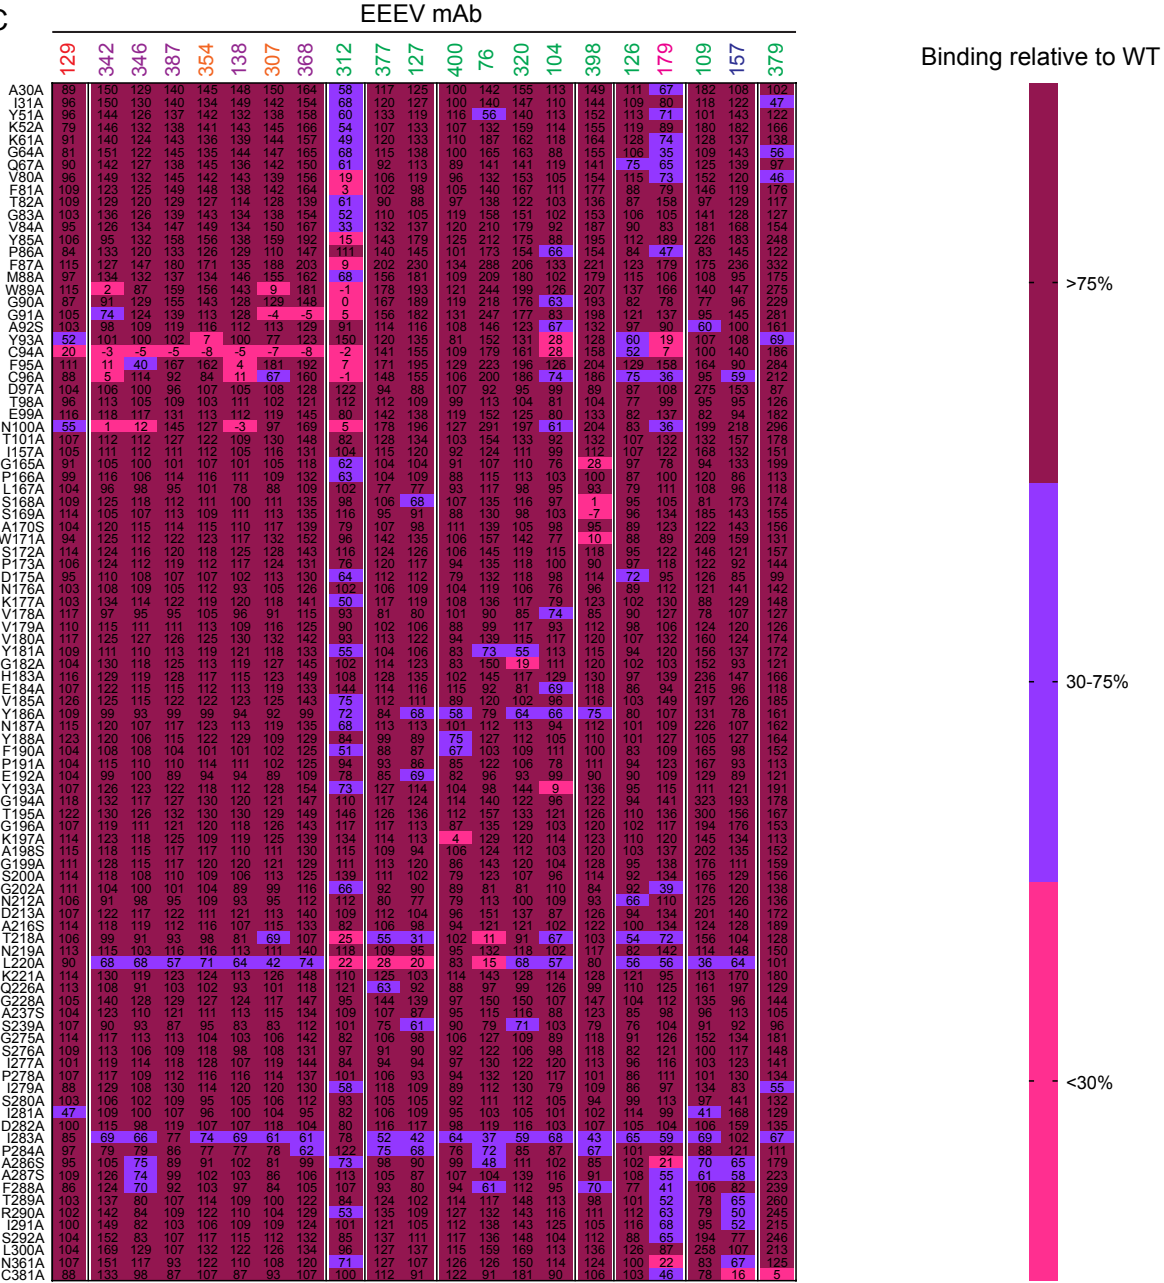

Supplement: NIHMS1730498-supplement-3.pdf [file NIHMS1730498-supplement-3.pdf]
