# Supplementary material
Source: PubMed Central journal article supplement (PMC8418820)
Supplement: NIHMS1730498-supplement-6.pdf [file NIHMS1730498-supplement-6.pdf]

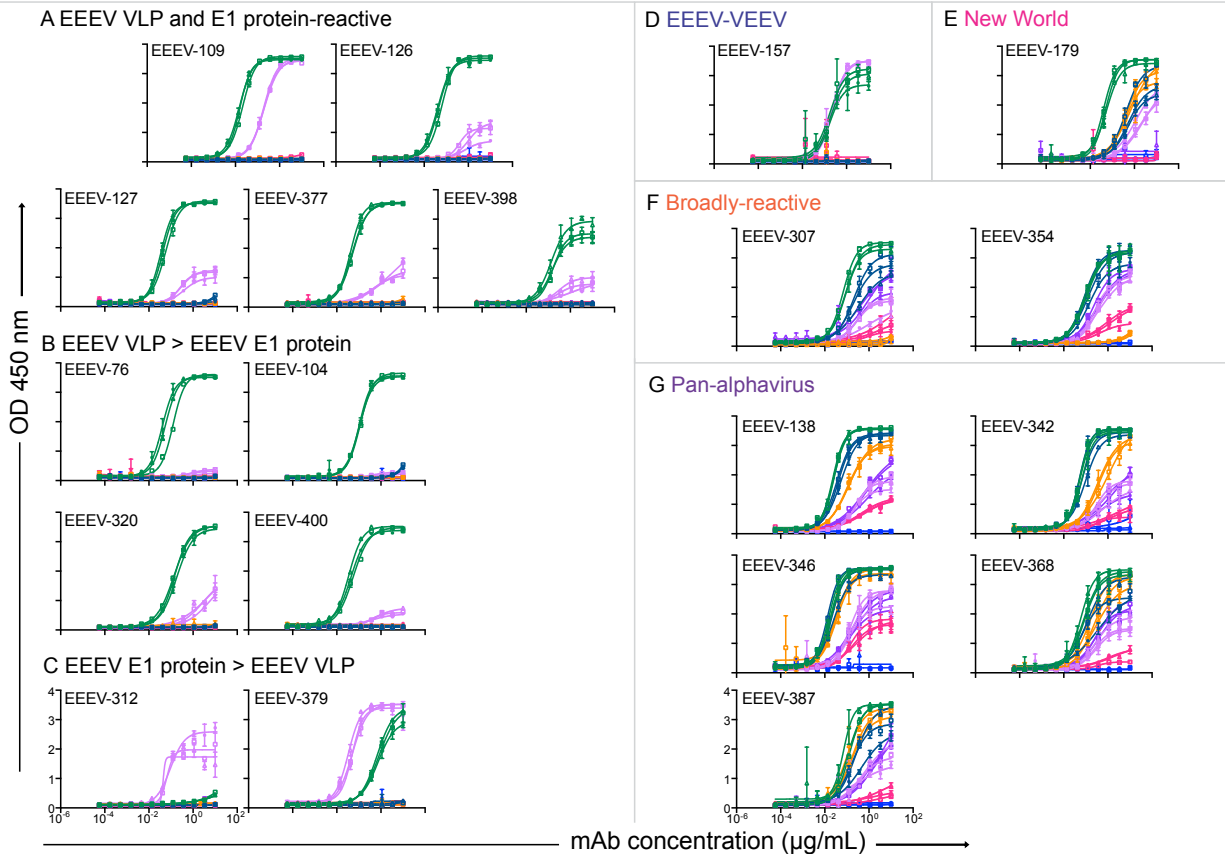

Legend for panels A through G

Symbols indicate temperature

- 22°C: circles
- 37°C: triangles
- 42°C: squares

Colors indicate antigens

- VLP: EEEV (green), VEEV (blue), WEEV (orange)
- E1 Protein: EEEV E1 (purple), CHIKV E1 (pink), MAYV E1 (red)
- E2 Protein: EEEV E2 (dark blue)

### H EEEV-specific mAbs

| Binding Group                    | EEEV mAb | Temperature-dependent binding EC <sub>50</sub> (ng/mL) |      |      |                 |       |      | VLP/Protein EC <sub>50</sub> Ratio |
|----------------------------------|----------|--------------------------------------------------------|------|------|-----------------|-------|------|------------------------------------|
|                                  |          | EEEV virus-like particles (VLPs)                       |      |      | EEEV E1 protein |       |      |                                    |
|                                  |          | 22°C                                                   | 37°C | 42°C | 22°C            | 37°C  | 42°C | 22°C                               |
| EEEV VLP and E1 protein-reactive | EEEV-109 | 16                                                     | 15   | 21   | 198             | 188   | 189  | 0.08                               |
|                                  | EEEV-127 | 35                                                     | 42   | 58   | 374             | 294   | 252  | 0.09                               |
|                                  | EEEV-126 | 43                                                     | 41   | 62   | 650             | 1,020 | 395  | 0.06                               |
|                                  | EEEV-377 | 50                                                     | 41   | 53   | 409             | 4,220 | 630  | 0.12                               |
|                                  | EEEV-398 | 152                                                    | 135  | 163  | 1,096           | 289   | 262  | 0.14                               |
| EEEV VLP > EEEV E1 protein       | EEEV-400 | 44                                                     | 35   | 55   | >               | >     | >    | NA                                 |
|                                  | EEEV-76  | 40                                                     | 55   | 123  | >               | >     | >    | NA                                 |
|                                  | EEEV-104 | 105                                                    | 102  | 115  | >               | >     | >    | NA                                 |
|                                  | EEEV-320 | 180                                                    | 143  | 135  | >               | >     | >    | NA                                 |
| EEEV E1 protein > EEEV VLP       | EEEV-379 | 739                                                    | 663  | 791  | 49              | 33    | 50   | 15.02                              |
|                                  | EEEV-312 | >                                                      | >    | >    | 94              | 44    | 65   | NA                                 |

### I Cross-reactive mAbs

| Cross reactivity | EEEV mAb | Temperature-dependent binding EC <sub>50</sub> (ng/mL) |      |      |       |                 |       |      |  | VLP/Protein EC <sub>50</sub> Ratio |
|------------------|----------|--------------------------------------------------------|------|------|-------|-----------------|-------|------|--|------------------------------------|
|                  |          | EEEV virus-like particles (VLPs)                       |      |      |       | EEEV E1 protein |       |      |  |                                    |
|                  |          | 22°C                                                   | 37°C | 42°C | 22°C  | 37°C            | 42°C  | 22°C |  |                                    |
| EEEV-VEEV        | EEEV-157 | 174                                                    | 192  | 174  | 222   | 230             | 214   | 0.79 |  |                                    |
|                  | EEEV-179 | 49                                                     | 55   | 40   | 2,686 | 1,100           | 1,651 | 0.09 |  |                                    |
| New World        | EEEV-307 | 85                                                     | 86   | 88   | 927   | 328             | 262   | 0.09 |  |                                    |
|                  | EEEV-354 | 94                                                     | 107  | 84   | 410   | 235             | 348   | 0.23 |  |                                    |
| Broadly-reactive | EEEV-346 | 18                                                     | 19   | 15   | 122   | 182             | 131   | 0.14 |  |                                    |
|                  | EEEV-387 | 118                                                    | 69   | 130  | 232   | 626             | 351   | 0.51 |  |                                    |
| Pan-alphavirus   | EEEV-138 | 23                                                     | 25   | 26   | 194   | 249             | 292   | 0.12 |  |                                    |
|                  | EEEV-342 | 53                                                     | 66   | 52   | 567   | 309             | 324   | 0.09 |  |                                    |
|                  | EEEV-368 | 83                                                     | 58   | 81   | 317   | 265             | 237   | 0.26 |  |                                    |
|                  | EEEV-387 | 118                                                    | 69   | 130  | 232   | 626             | 351   | 0.51 |  |                                    |
|                  | EEEV-387 | 118                                                    | 69   | 130  | 232   | 626             | 351   | 0.51 |  |                                    |

Legend for panels H and I

EC<sub>50</sub> (ng/mL)

- 0-100
- 101-500
- 501-5,000
- >5,001

VLP/Protein EC<sub>50</sub> Ratio

- 0-1.00
- 1.01-2.00
- 2.01-5.00
- >5.01
