# Supplementary material
Source: PubMed Central journal article supplement (PMC8418820)

A

E1 protein amino acid sequence alignment for indicated strain

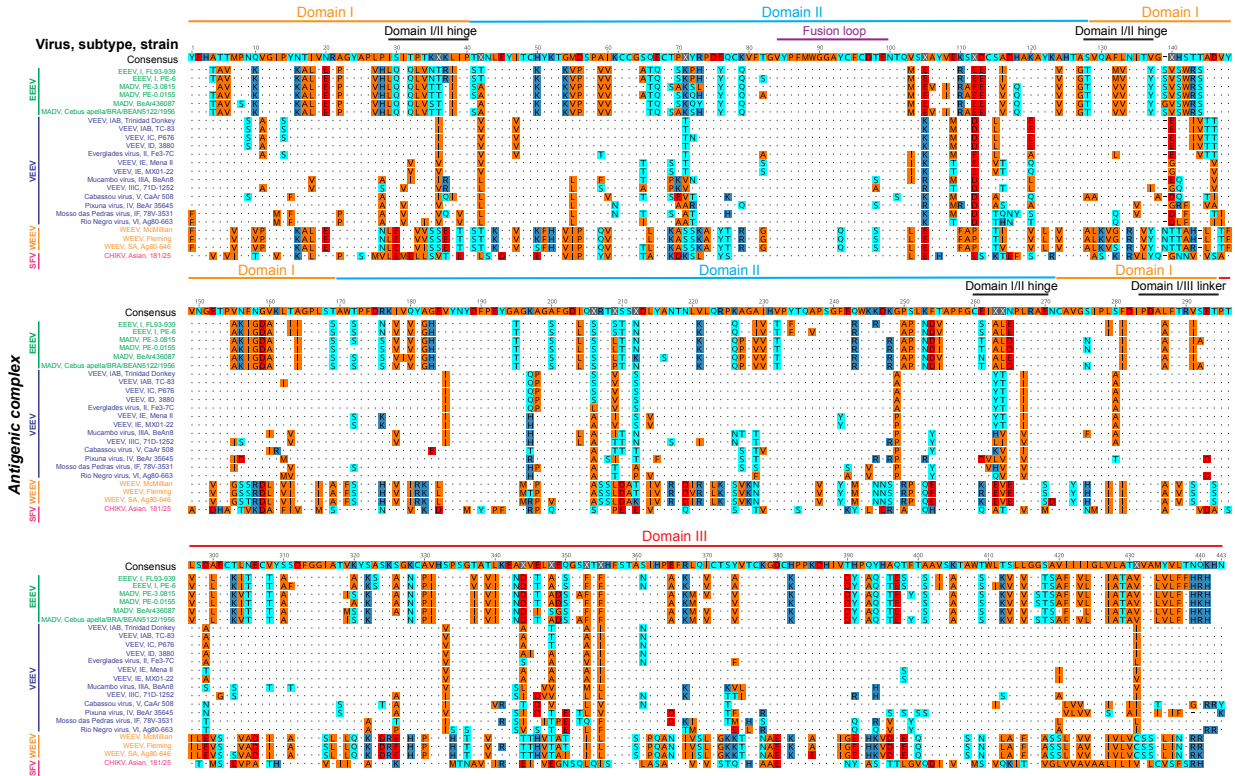

B

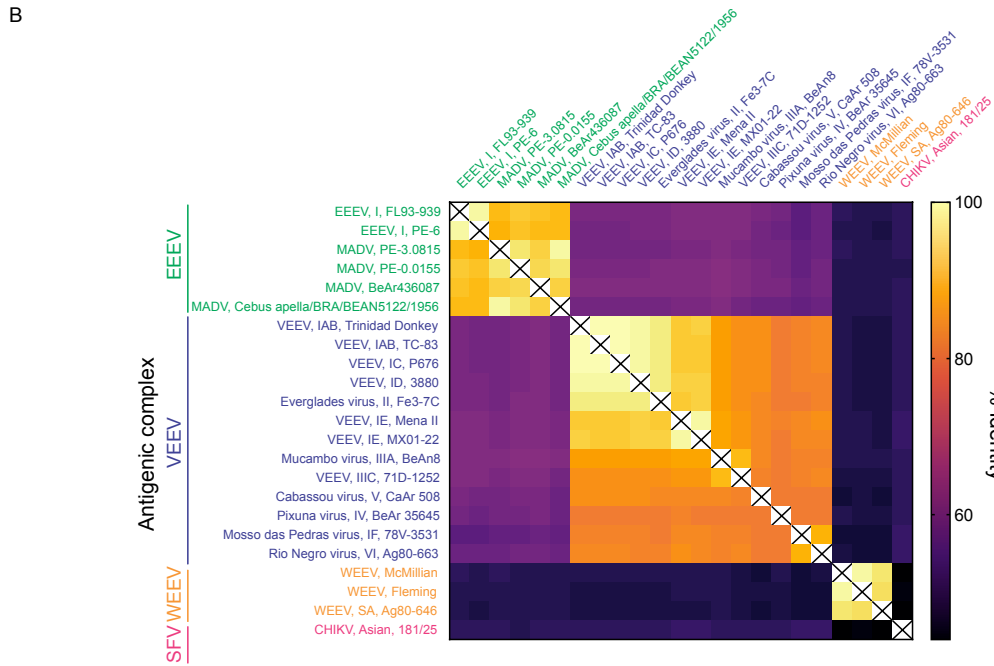

Supplement: NIHMS1730498-supplement-2.pdf [file NIHMS1730498-supplement-2.pdf]

A

EEEV E1 sequence coverage map for EEEV-126 Fab

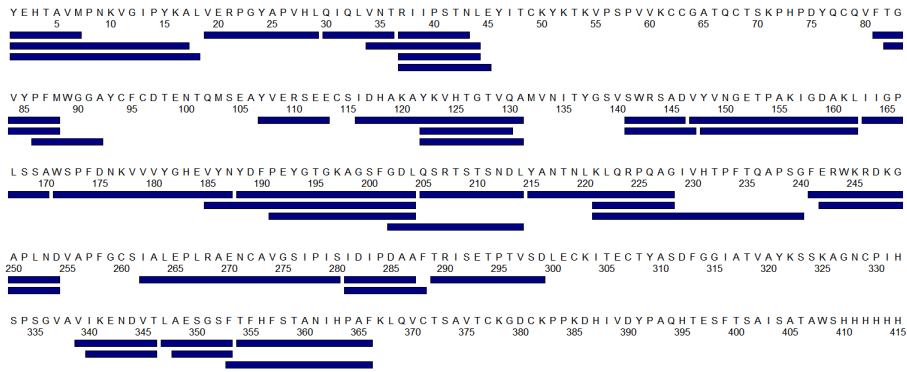

Total: 42 Peptides, 62.7% Coverage, 1.81 Redundancy

B

Peptide plots

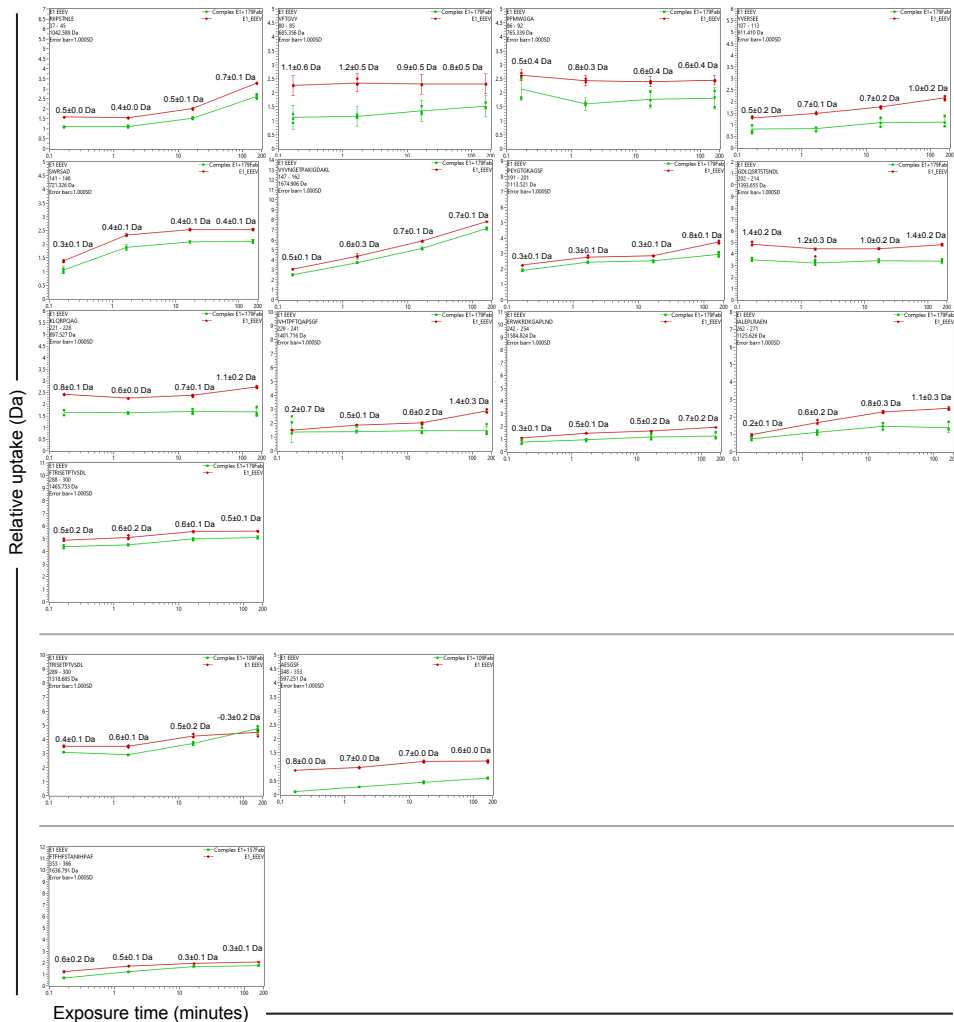

Supplement: NIHMS1730498-supplement-4.pdf [file NIHMS1730498-supplement-4.pdf]

A

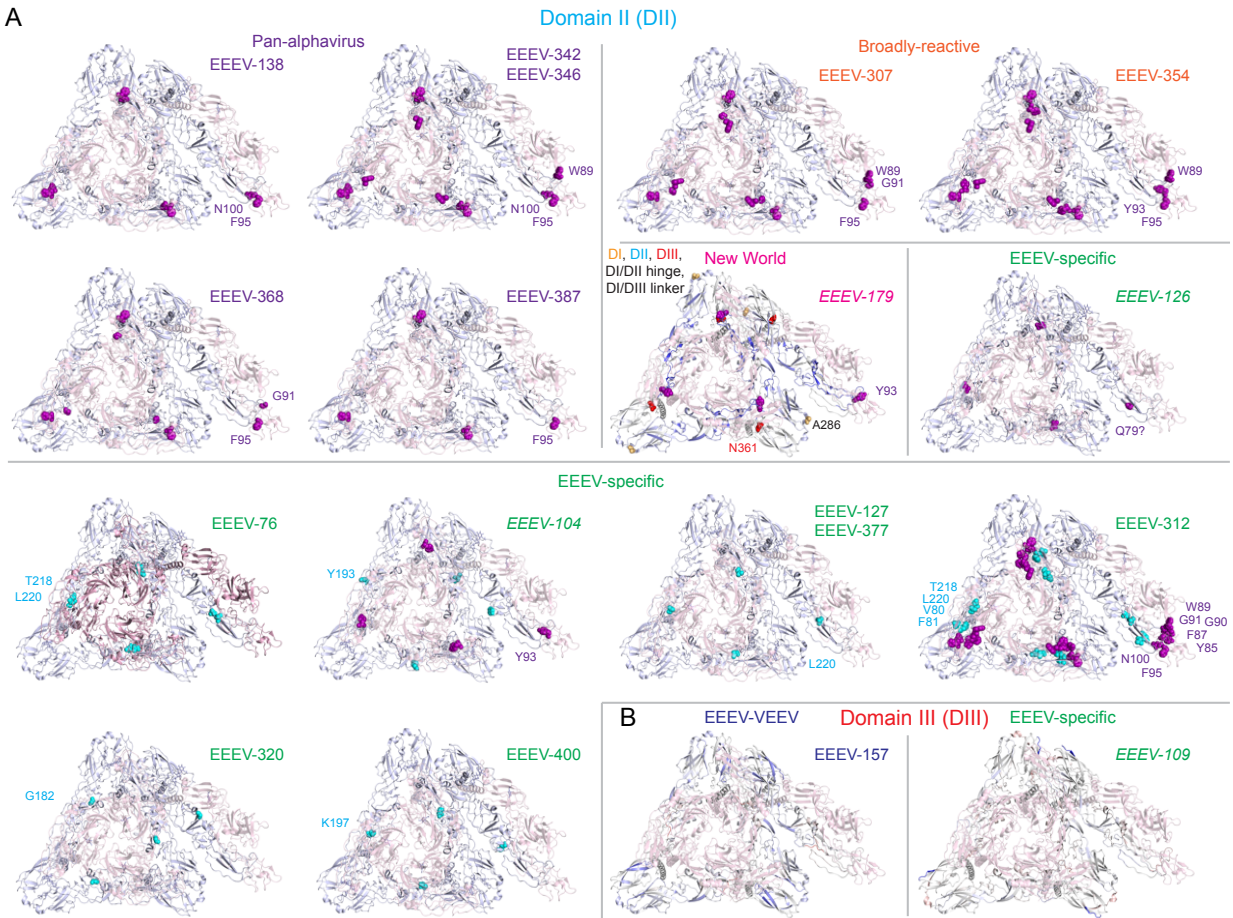

C Domain I (DI)

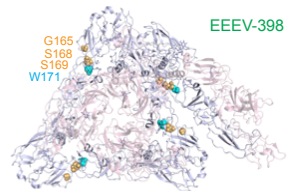

Supplement: NIHMS1730498-supplement-5.pdf [file NIHMS1730498-supplement-5.pdf]

Neutralization curves in FRNT assay for indicated virus, at 37 or 42 °C

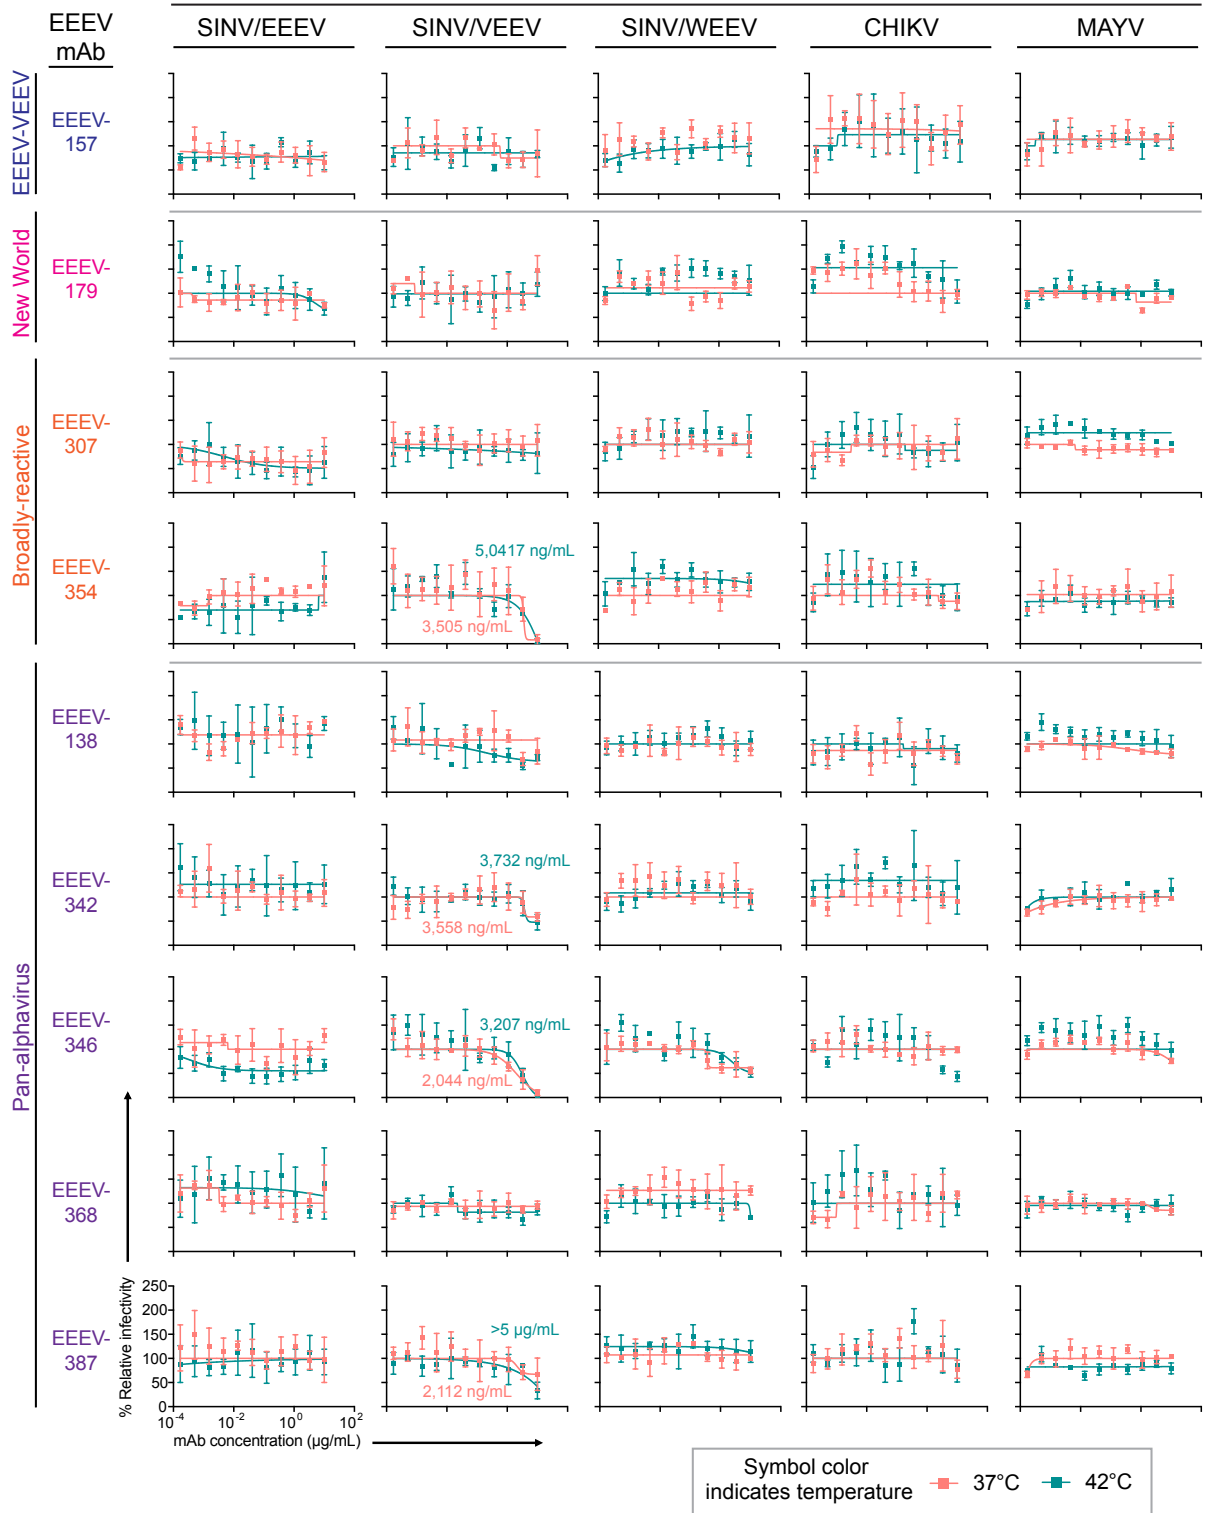

Supplement: NIHMS1730498-supplement-7.pdf [file NIHMS1730498-supplement-7.pdf]

**A**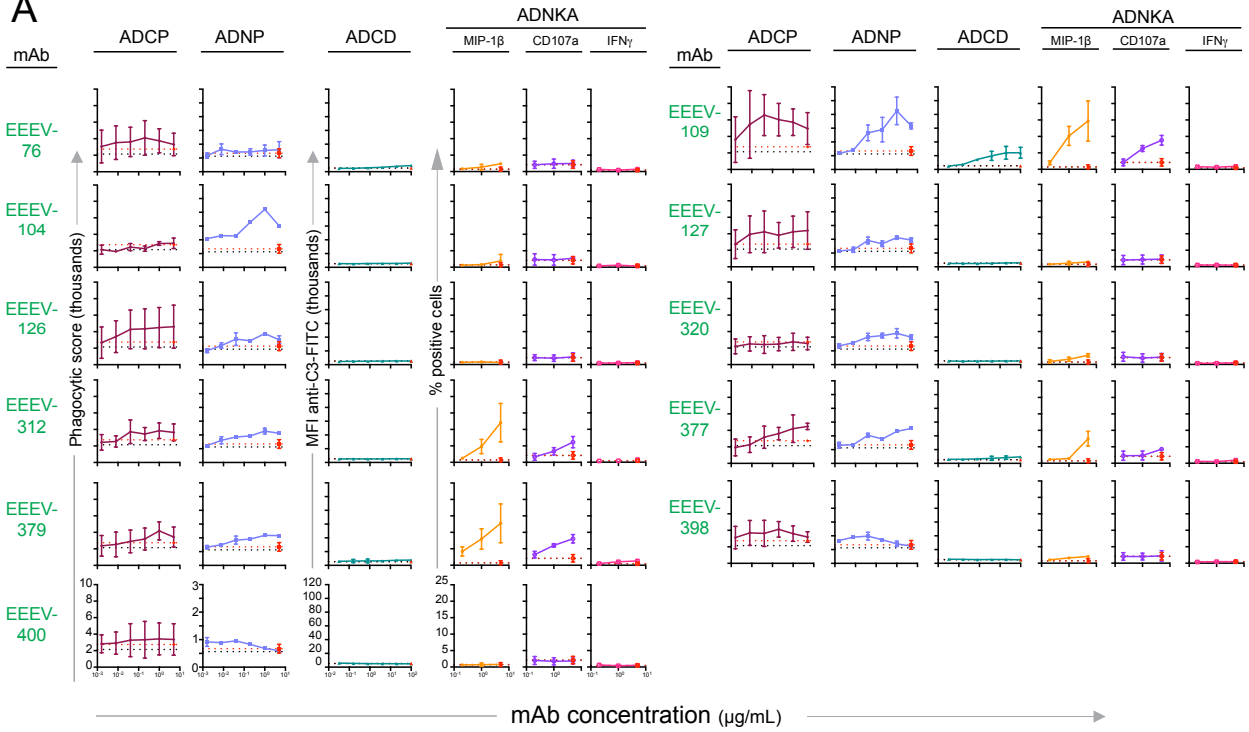**B**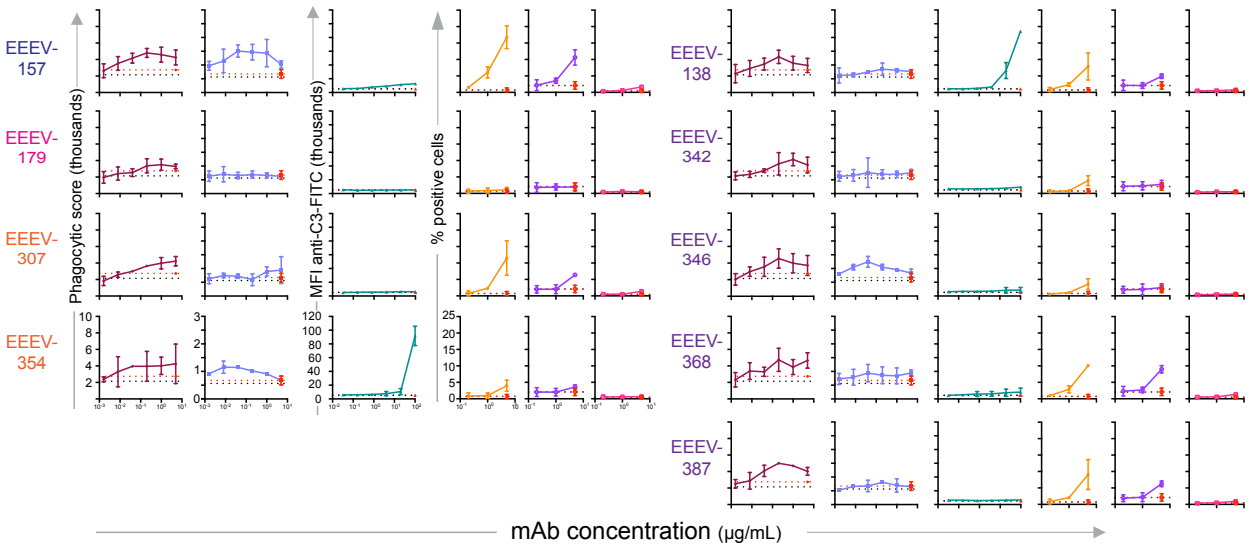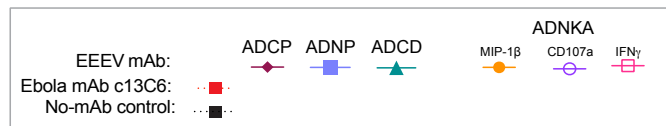

Supplement: NIHMS1730498-supplement-8.pdf [file NIHMS1730498-supplement-8.pdf]
